# Supplementary material
Source: publisher site journal article supplement (https://oneecosystem.pensoft.net/article/download/suppl/7674647/)
Supplement: Supplementary file 1

**Appendix 6. Summary of the condition assessment of wetlands in MAES-HU (indicators, scores and threshold values)**

*6.1 Indicators and scores (wetlands)*

| Indicator                                                     | Unit         | Rule / Score                                                                 |
|---------------------------------------------------------------|--------------|------------------------------------------------------------------------------|
| Proportion of wetlands                                        | 220 m radius | IF proportion > 80% → +2                                                     |
|                                                               |              | IF proportion 51-80% → +1                                                    |
|                                                               |              | IF proportion 21-50 % → + 0                                                  |
|                                                               |              | IF proportion 0-20% → -1                                                     |
| Frequency of water cover<br>( <i>Copernicus HRL</i> Water and | 20 m cell    | IF value >38% → +2                                                           |
|                                                               |              | IF value > 0 but <38 → +1                                                    |
| Presence of surface water and temporary surface water         | 220 m radius | IF WWPI>0 cell or surface water cell is present within the 220 m radius → +1 |
| Heterogeneity of wetland types                                | 220 m radius | IF proportion of a different wetland category >=10% → +1                     |
|                                                               |              | IF proportion of a different wetland category also >= 10%                    |
| Proportion of seminatural areas                               | 220 m radius | IF proportion > 80% → +2                                                     |
|                                                               |              | IF proportion 51-80% → +1                                                    |
|                                                               |              | IF proportion 21-50 % → + 0                                                  |
|                                                               |              | IF proportion 0-20% → -1                                                     |
| Presence of roads                                             | 20 m cell    | IF road is present → -1                                                      |

*6.2 Thresholds for the simplified scores (wetlands)*

| Score | Simplified score |
|-------|------------------|
| -3    | 1                |
| -2    | 1                |
| -1    | 1                |
| 0     | 2                |
| 1     | 2                |
| 2     | 3                |
| 3     | 3                |
| 4     | 4                |
| 5     | 4                |
| 6     | 5                |
| 7     | 5                |
| 8     | 5                |
